# Supplementary material for: Single cell transcriptomics of human epidermis identifies basal stem cell transition states
Source: PubMed Central journal article supplement (PMC7447770; doi:10.1038/s41467-020-18075-7), 2020-08-25
Supplement: 41467_2020_18075_MOESM8_ESM.pdf [file 41467_2020_18075_MOESM8_ESM.pdf]

**Title:** Supplementary Data File 1:

**Description:** Differentially expressed genes from integrative or single library clustering of human neonatal epidermis.

**Title:** Supplementary Data File 2:

**Description:** Ligand, receptor, and downstream target genes used for cell-cell signaling analysis of WNT, JAK/STAT, NOTCH, and TGF- $\beta$  signaling pathways.

**Title:** Supplementary Data File 3:

**Description:** Differentially expressed genes from subclustering of human neonatal epidermal keratinocytes.

**Title:** Supplementary Data File 4:

**Description:** Differentially expressed genes along the putative BAS-SPN-GRN differentiation trajectory of human neonatal epidermal keratinocytes.

**Title:** Supplementary Data File 5:

**Description:** Differentially expressed genes from subclustering of human neonatal epidermal basal clusters.
